# Supplementary material for: A targeted self-assembling photosensitizer nanofiber constructed by multicomponent coordination
Source: Royal Society of Chemistry journal article supplement (doi:10.1039/d1bm01559a), 2021-11-19
Supplement: d1bm01559a1.pdf [file d1bm01559a1.pdf]

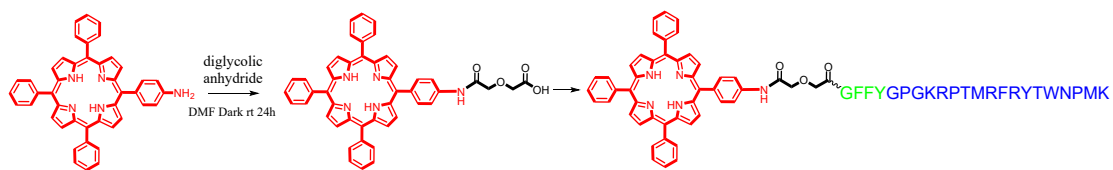

Figure S1. Synthetic route of CPP44-FF-TPP.

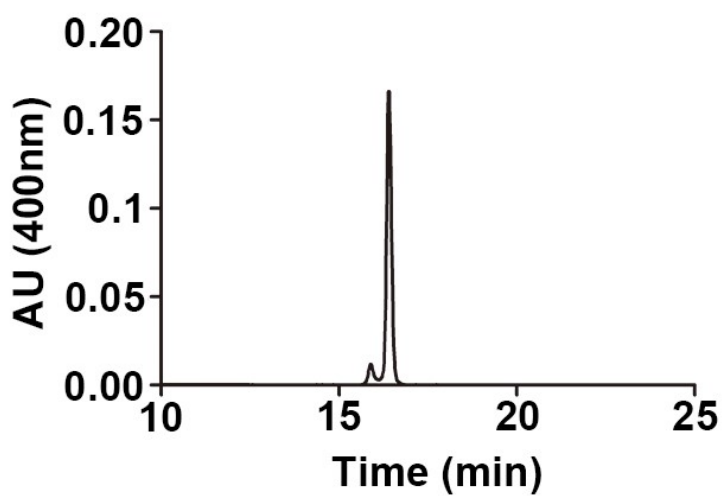

Figure S2. HPLC chromatogram of CPP44-FF-TPP.

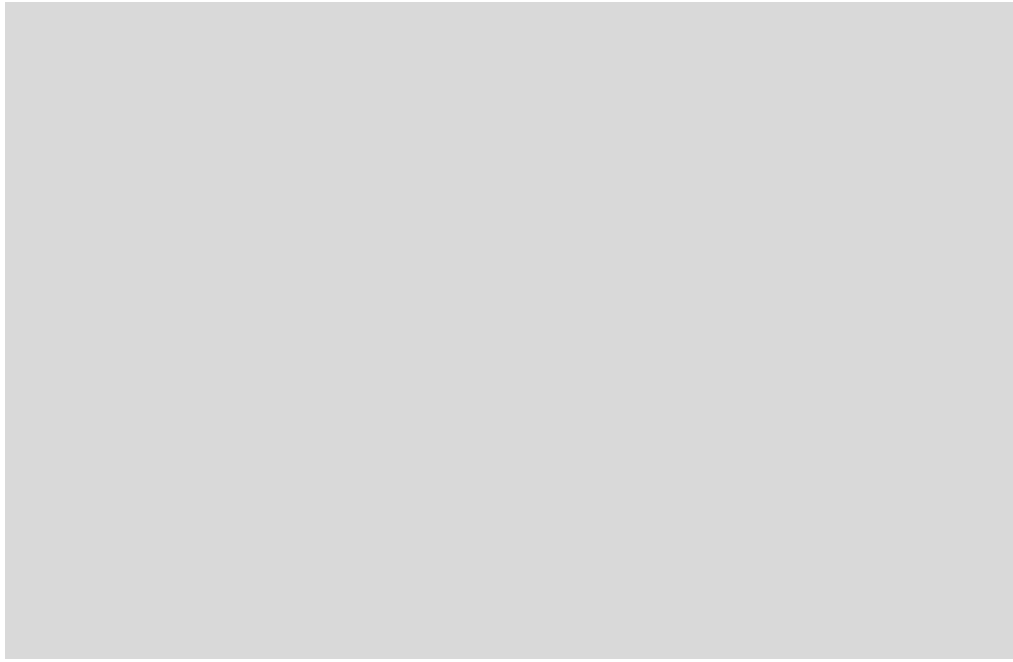

Figure S3. MALDI-TOF-MS spectrum of CPP44-FF-TPP.

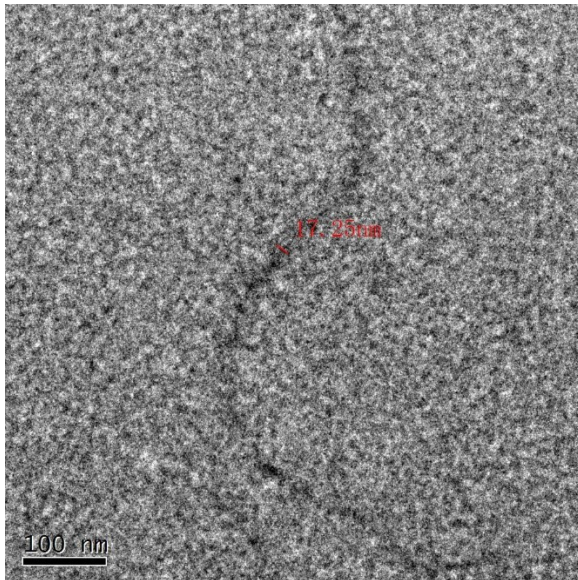

Figure S4. TEM image of CFTNFs partial enlarged detail at the concentration of 3 mg mL<sup>-1</sup>.

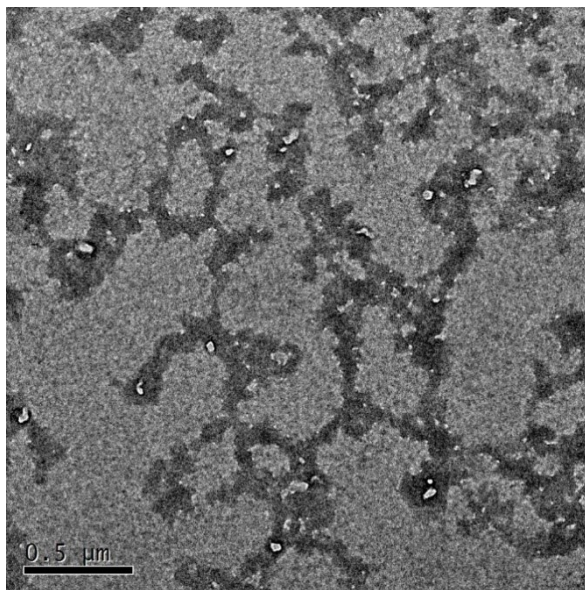

Figure S5. TEM image of CFTNFs at the concentration of 30 mg mL<sup>-1</sup>.

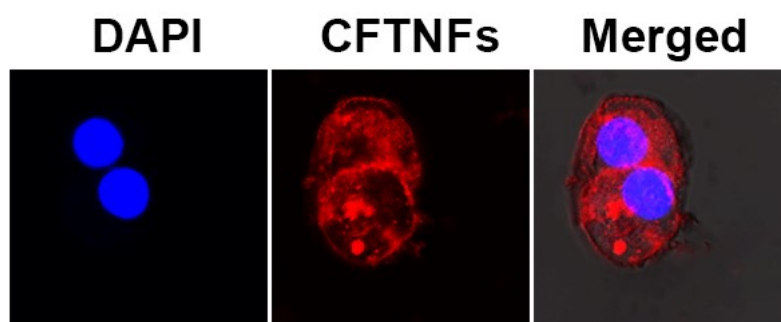

Figure S6. CFTNFs ( $3 \times 10^{-6}$  M) distribution in HepG2 cells examined by laser scanning confocal microscopy. Blue: DAPI; red: CFTNFs.

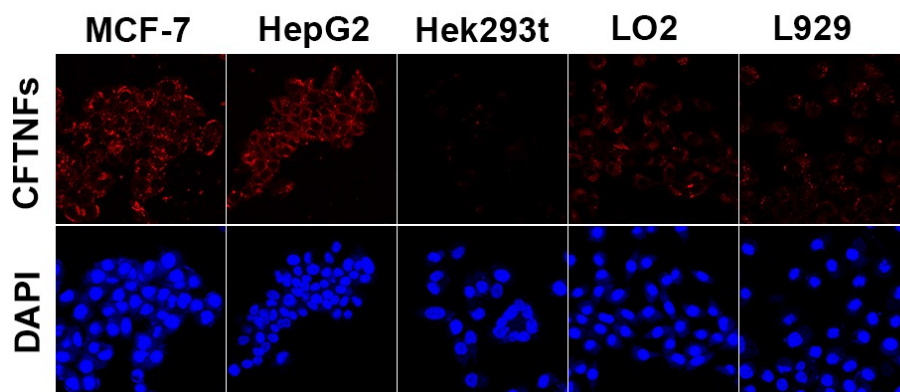

Figure S7. CFTNFs ( $1 \times 10^{-6}$  M) distribution in various cancer cells and non-cancer cells examined by laser scanning confocal microscopy. Blue: DAPI; red: CFTNFs.

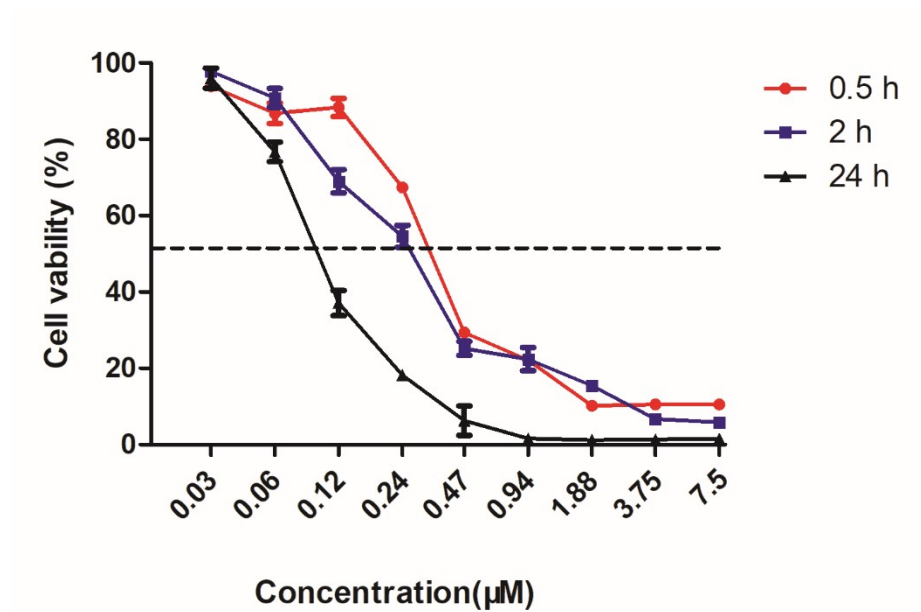

Figure S8. The cytotoxicity of CFTNFs at several time intervals.

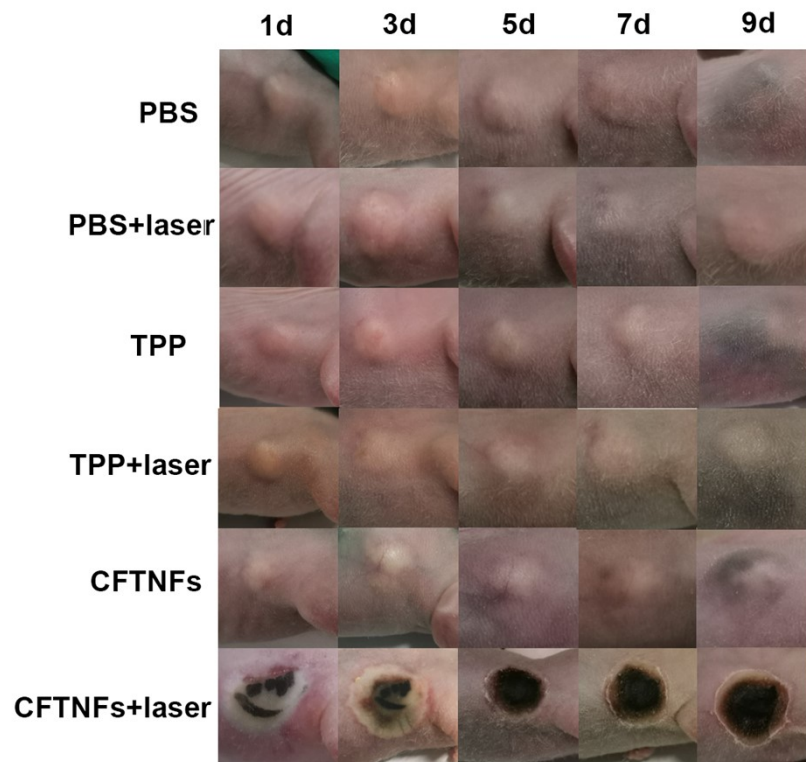

Figure S9. Images of HepG2 tumor-bearing mice in 12 days observation.
